# Supplementary material for: Understanding the stability, bonding nature and chemical reactivity of 3d-substituted heterofullerenes C58TM (TM = Sc–Zn) from DFT studies
Source: Royal Society of Chemistry journal article supplement (doi:10.1039/c4ra04139a), 2014-01-01
Supplement: c4ra04139a1.pdf [file c4ra04139a1.pdf]

Supporting Information

**Understanding the stability, bonding nature and chemical reactivity of 3d-substituted heterofullerenes C<sub>58</sub>TM (TM=Sc-Zn) from DFT study**

Jiguang Du<sup>\*1</sup>, Xiyuan Sun<sup>2</sup>, Jun Chen<sup>3</sup>, Gang Jiang<sup>4</sup>

<sup>1</sup>College of Physical Science and Technology, Sichuan University, Chengdu 610065, China

<sup>2</sup>College of Life and Basic Sciences, Sichuan Agricultural University, Ya'an 625014, China

<sup>3</sup>State key Laboratory of surface physics and chemistry, Mianyang, Sichuan 621907, China

<sup>4</sup>Institute of Atomic and Molecular Physics, Sichuan University, Chengdu 610065, China

Table S1. The total energies of different spin multiplicities for studied [6:6] isomers.

| Species            | Spin multiplicity | Total energy |
|--------------------|-------------------|--------------|
| C <sub>58</sub> Sc | 2                 | -2256.335449 |
|                    | 4                 | -2256.290212 |
| C <sub>58</sub> Ti | 1                 | -2267.853345 |
|                    | 3                 | -2267.827127 |
| C <sub>58</sub> V  | 2                 | -2281.128903 |
|                    | 4                 | -2281.106386 |
| C <sub>58</sub> Cr | 1                 | -2296.285490 |
|                    | 3                 | -2296.350446 |
|                    | 5                 | -2296.337705 |
| C <sub>58</sub> Mn | 2                 | -2313.638802 |
|                    | 4                 | -2313.685258 |
|                    | 6                 | -2313.676446 |
| C <sub>58</sub> Fe | 1                 | -2333.057868 |
|                    | 3                 | -2333.135548 |
|                    | 5                 | -2333.149262 |
|                    | 7                 | -2333.084332 |
| C <sub>58</sub> Co | 2                 | -2354.979916 |
|                    | 4                 | -2354.972662 |
| C <sub>58</sub> Ni | 1                 | -2379.293412 |
|                    | 3                 | -2379.283189 |
| C <sub>58</sub> Cu | 2                 | -2406.244143 |
|                    | 4                 | -2406.186901 |
| C <sub>58</sub> Zn | 1                 | -2435.609229 |
|                    | 3                 | -2435.580858 |

\* Corresponding author:  
E-mail: dujg@scu.edu.cn
